# Supplementary material for: CTD: An information-theoretic algorithm to interpret sets of metabolomic and transcriptomic perturbations in the context of graphical models
Source: PLoS Comput Biol. 2021 Jan 29;17(1):e1008550. doi: 10.1371/journal.pcbi.1008550 (PMC7875364; doi:10.1371/journal.pcbi.1008550)
Supplement: S4 Table — Only pathways with a nominal p-value < 0.05 are shown. (XLSX) [file pcbi.1008550.s005.xlsx]

## Sheet: Sheet1
Diagnosis	Pathway No.	Pathway	Size	Hits	P-value	FDR
Citrullinemia	N/A	Carbamoylphosphate Pathway	17	6	0.015	0.245
	3	Glycogen Metabolism	2	2	0.017	0.245
	27	Eicosanoids	9	4	0.02	0.245
	38	Fatty Acid Metabolism	10	4	0.03	0.245
	9	Pyrimidine Metabolism	10	4	0.03	0.245
	1	Glycosylation	6	3	0.031	0.245
Maple syrup urine disease	6	BCAA-Metabolism	18	7	4.23e-05	0.002
	19	Glutathione-Metabolism	11	3	0.025	0.505
	2	Ascorbate-Metabolism	5	2	0.032	0.505
Methylmalonic aciduria	6	BCAA-Metabolism	18	10	0.0001	0.005
	29	Creatine-Metabolism	5	3	0.03	0.713
Propionic aciduria	N/A	Beta-Oxidation	3	3	0.0006	0.027
	17	Carnitine-Biosynthesis	5	3	0.005	0.119
	6	BCAA-Metabolism	18	5	0.013	0.21
	12	Purine-Metabolism	16	4	0.039	0.396
Phenylketonuria	39	Hemoglobin-Porphyrin-Metabolism	8	4	0.0007	0.031
